# Supplementary material for: Polymorphisms in Long Noncoding RNA H19 Contribute to the Protective Effects of Coal Workers’ Pneumoconiosis in a Chinese Population
Source: PubMed Central journal article supplement (PMC5036736; doi:10.3390/ijerph13090903), 2016-09-12
Supplement: ijerph-13-00903-s001.pdf [file ijerph-13-00903-s001.pdf]

# Supplementary Materials: Polymorphisms in Long Noncoding RNA *H19* Contribute to the Protective Effects of Coal Workers' Pneumoconiosis in a Chinese Population

Qiuyun Wu, Weiwen Yan, Ruhui Han, Jingjin Yang, Jiali Yuan, Xiaoming Ji, Yi Liu and Chunhui Ni

## Supplementary Table S1

**Table S1.** Functions prediction of rs2067051 and genetic variants in high linkage disequilibrium (LD).

| SNPs       | $r^2$ | Ref>Alt | miRNA:lncRNA | Structure |
|------------|-------|---------|--------------|-----------|
| rs2067051  | 1.00  | C>T     | ×            | √         |
| rs3741219  | 0.91  | A>G     | √            | √         |
| rs10840159 | 0.91  | A>G     | √            | √         |
| rs2839701  | 0.90  | C>G     | √            | √         |
| rs2075745  | 0.98  | A>G     | √            | √         |
| rs2075744  | 0.98  | A>G     | √            | √         |
| rs2839698  | 0.97  | G>A     | √            | √         |

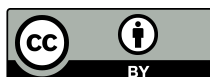

© 2016 by the authors. Submitted for possible open access publication under the terms and conditions of the Creative Commons Attribution (CC-BY) license (<http://creativecommons.org/licenses/by/4.0/>).
